# Supplementary material for: Predominance of asymptomatic and sub-microscopic infections characterizes the Plasmodium gametocyte reservoir in the Peruvian Amazon
Source: PubMed Central journal article supplement (PMC5510906; doi:10.1371/journal.pntd.0005674), 2017-07-03
Supplement: pntd.0005674.s002.pdf [file pntd.0005674.s002.pdf]

**S1 Table. Characteristics of the study cohort at screening, by survey.**

|                                     | Dec-13       |      | Mar-14       |      | Jun-14       |      | Sep-14       |      | Dec-14       |      | <i>P</i> -value  |
|-------------------------------------|--------------|------|--------------|------|--------------|------|--------------|------|--------------|------|------------------|
|                                     | n            | %    | n            | %    | n            | %    | n            | %    | n            | %    |                  |
| Individuals sampled                 | 1648         | -    | 659          | -    | 1653         | -    | 1648         | -    | 1657         | -    | <b>&lt;0.001</b> |
| Age, <i>mean (95% CI)</i>           | 27.6 (4, 67) |      | 26.1 (4, 66) |      | 28.2 (4, 68) |      | 28.0 (5, 68) |      | 28.1 (5, 68) |      | 0.190            |
| Age                                 |              |      |              |      |              |      |              |      |              |      |                  |
| ≤5y                                 | 149          | 9.0  | 65           | 9.9  | 144          | 8.7  | 134          | 8.1  | 129          | 7.8  |                  |
| >5y - 10y                           | 260          | 15.8 | 112          | 17.0 | 260          | 15.7 | 279          | 16.9 | 279          | 16.8 |                  |
| >10y - 15y                          | 221          | 13.4 | 115          | 17.5 | 229          | 13.9 | 229          | 13.9 | 226          | 13.6 |                  |
| >15y - 25y                          | 269          | 16.3 | 86           | 13.1 | 246          | 14.9 | 248          | 15.0 | 260          | 15.7 |                  |
| >25y                                | 749          | 45.4 | 281          | 42.6 | 774          | 46.8 | 758          | 46.0 | 763          | 46.0 | 0.413            |
| Male/female ratio                   | 1.05         | -    | 0.94         | -    | 0.99         | -    | 0.97         | -    | 0.99         | -    | 0.712            |
| Work status                         |              |      |              |      |              |      |              |      |              |      |                  |
| Employed                            | 551          | 33.5 | 198          | 30.1 | 554          | 33.6 | 537          | 32.6 | 538          | 32.5 |                  |
| Students or children                | 736          | 44.7 | 322          | 49.0 | 730          | 44.2 | 745          | 45.3 | 750          | 45.3 |                  |
| Other (including housework)         | 360          | 21.9 | 137          | 20.9 | 366          | 22.2 | 363          | 22.1 | 366          | 22.1 | 0.761            |
| Households sampled                  | 411          | -    | 209          | -    | 419          | -    | 409          | -    | 409          | -    | <b>&lt;0.001</b> |
| House wall materials                |              |      |              |      |              |      |              |      |              |      |                  |
| Brick, cement                       | 39           | 9.5  | 19           | 9.1  | 37           | 8.8  | 36           | 8.8  | 35           | 8.6  |                  |
| Wood                                | 318          | 77.4 | 165          | 78.9 | 325          | 77.6 | 316          | 77.3 | 319          | 78.0 |                  |
| Palm                                | 36           | 8.8  | 15           | 7.2  | 37           | 8.8  | 37           | 9.0  | 35           | 8.6  |                  |
| Other                               | 18           | 4.4  | 10           | 4.8  | 20           | 4.8  | 20           | 4.9  | 20           | 4.9  | 0.990            |
| Had malaria previous year           | 512          | 31.4 | 275          | 42.0 | 520          | 31.8 | 505          | 31.0 | 519          | 31.7 | <b>0.001</b>     |
| Visits with symptoms <sup>a</sup>   | 239          | 18.2 | 67           | 12.5 | 209          | 16.0 | 120          | 9.1  | 127          | 9.9  | <b>0.001</b>     |
| Clinical malaria cases <sup>b</sup> |              |      |              |      |              |      |              |      |              |      |                  |
| <i>P. vivax</i>                     | 11           | 0.8  | 5            | 0.9  | 19           | 1.5  | 17           | 1.3  | 4            | 0.3  | <b>0.030</b>     |
| <i>P. falciparum</i>                | 1            | 0.1  | 0            | 0.0  | 0            | 0.0  | 1            | 0.1  | 0            | 0.0  | 0.667            |

<sup>a</sup>fever, headache and/or chills (among those with full clinical data available at the time of visit and during the previous 7 days); <sup>b</sup>by light microscopy at screening. CI, confidence interval.
