# Supplementary material for: Predominance of asymptomatic and sub-microscopic infections characterizes the Plasmodium gametocyte reservoir in the Peruvian Amazon
Source: PubMed Central journal article supplement (PMC5510906; doi:10.1371/journal.pntd.0005674), 2017-07-03
Supplement: pntd.0005674.s003.pdf [file pntd.0005674.s003.pdf]

**S2 Table. Univariate associations with *P. vivax* infections.** Only significant results are shown ( $P < 0.05$ ).

| Variable                  | OR                  | Parasite prevalence |                                   |
|---------------------------|---------------------|---------------------|-----------------------------------|
|                           |                     | 95% CI              | <i>P</i> -value <sup>a</sup>      |
| Age category              |                     |                     |                                   |
| ≤5y                       | 1                   |                     |                                   |
| >5y - 10y                 | 2.04                | 1.18, 3.54          | <b>0.010</b>                      |
| >10y - 15y                | 2.55                | 1.46, 4.43          | <b>0.001</b>                      |
| >15y - 25y                | 3.35                | 1.95, 5.76          | <b>&lt;0.001</b>                  |
| >25y                      | 2.34                | 1.41, 3.88          | <b>0.001</b> ( <i>&lt;0.001</i> ) |
| Village                   |                     |                     |                                   |
| Cahuide                   | 1                   |                     |                                   |
| Lupuna                    | 2.07                | 1.62, 2.64          | <b>&lt;0.001</b>                  |
| House wall                |                     |                     |                                   |
| Brick, cement             | 1                   |                     |                                   |
| Wood                      | 1.36                | 0.84, 2.21          | 0.209                             |
| Palm                      | 1.73                | 0.93, 3.23          | 0.082                             |
| Other                     | 2.03                | 1.01, 4.10          | <b>0.049</b> ( <i>0.168</i> )     |
| Fever, headache or chills | 2.24                | 1.72, 2.94          | <b>&lt;0.001</b>                  |
| Gametocyte rate           |                     |                     |                                   |
| Variable                  | OR                  | 95% CI              | <i>P</i> -value <sup>a</sup>      |
| Village                   |                     |                     |                                   |
| Cahuide                   | 1                   |                     |                                   |
| Lupuna                    | 1.62                | 1.08, 2.44          | <b>0.019</b>                      |
| Survey                    |                     |                     |                                   |
| Dec-13                    | 1                   |                     |                                   |
| Mar-14                    | 1.05                | 0.50, 2.18          | 0.900                             |
| Jun-14                    | 0.97                | 0.55, 1.65          | 0.900                             |
| Sep-14                    | 0.46                | 0.26, 0.83          | <b>0.010</b>                      |
| Dec-14                    | 0.64                | 0.35, 1.17          | 0.146 ( <i>0.042</i> )            |
| Asexual density (log)     | 2.16                | 1.88, 2.48          | <b>&lt;0.001</b>                  |
| Fever, headache or chills | 3.58                | 2.14, 5.99          | <b>&lt;0.001</b>                  |
| Parasite density, by 18S  |                     |                     |                                   |
| Variable                  | Effect <sup>b</sup> | 95% CI              | <i>P</i> -value <sup>a</sup>      |
| Village                   |                     |                     |                                   |
| Cahuide                   | 1                   |                     |                                   |
| Lupuna                    | 1.97                | 1.34, 2.94          | <b>0.001</b>                      |
| Work status               |                     |                     |                                   |
| Employed                  | 1                   |                     |                                   |
| Students or children      | 1.99                | 1.28, 3.10          | <b>0.002</b>                      |
| Other                     | 1.58                | 0.93, 2.69          | 0.086 ( <i>0.007</i> )            |
| Fever, headache or chills | 5.75                | 3.60, 9.21          | <b>&lt;0.001</b>                  |
| Gametocyte density        |                     |                     |                                   |
| Variable                  | Effect <sup>b</sup> | 95% CI              | <i>P</i> -value                   |
| Asexual density (log)     | 1.14                | 1.01, 1.30          | <b>0.048</b>                      |

<sup>a</sup>result of Wald test shown in brackets; <sup>b</sup>calculated as  $e^{\beta}$  regression coefficient. OR, odds ratio; CI, confidence interval.
