# Supplementary material for: Predominance of asymptomatic and sub-microscopic infections characterizes the Plasmodium gametocyte reservoir in the Peruvian Amazon
Source: PubMed Central journal article supplement (PMC5510906; doi:10.1371/journal.pntd.0005674), 2017-07-03
Supplement: pntd.0005674.s004.pdf [file pntd.0005674.s004.pdf]

**S3 Table. Multivariate models for *P. vivax* densities.**

| Variable                  | Parasite density, by 18S |            |                      | Gametocyte density  |            |                      |
|---------------------------|--------------------------|------------|----------------------|---------------------|------------|----------------------|
|                           | Effect <sup>a</sup>      | 95% CI     | P-value <sup>b</sup> | Effect <sup>a</sup> | 95% CI     | P-value <sup>b</sup> |
| Age                       |                          |            |                      |                     |            |                      |
| ≤5y                       | 1                        |            |                      | 1                   |            |                      |
| >5y - 10y                 | 1.46                     | 0.49, 4.33 | 0.493                | 0.67                | 0.11, 3.90 | 0.657                |
| >10y - 15y                | 1.51                     | 0.51, 4.51 | 0.457                | 0.63                | 0.11, 3.46 | 0.591                |
| >15y - 25y                | 1.39                     | 0.48, 4.04 | 0.547                | 0.33                | 0.06, 1.73 | 0.188                |
| >25y                      | 0.82                     | 0.30, 2.27 | 0.704                | 1.05                | 0.21, 5.37 | 0.951                |
|                           |                          |            | (0.109)              |                     |            | (0.136)              |
| Village                   |                          |            |                      |                     |            |                      |
| Cahuide                   | 1                        |            |                      | -                   | -          | -                    |
| Lupuna                    | 1.59                     | 1.05, 2.42 | <b>0.028</b>         | -                   | -          | -                    |
| 18S copies/μl (log)       | -                        | -          | -                    | 1.16                | 1.01, 1.32 | <b>0.034</b>         |
| Fever, headache or chills | 5.93                     | 5.73, 9.17 | <b>&lt;0.001</b>     | -                   | -          | -                    |

<sup>a</sup>calculated as e<sup>β</sup> regression coefficient; <sup>b</sup>result of Wald test shown in brackets. CI, confidence interval.
