# Supplementary material for: Predominance of asymptomatic and sub-microscopic infections characterizes the Plasmodium gametocyte reservoir in the Peruvian Amazon
Source: PubMed Central journal article supplement (PMC5510906; doi:10.1371/journal.pntd.0005674), 2017-07-03
Supplement: pntd.0005674.s005.pdf [file pntd.0005674.s005.pdf]

**S4 Table. Univariate and multivariate associations with *P. falciparum* infections.** For univariate analysis only significant results are shown ( $P<0.05$ ). Association analysis was not attempted for sexual stage infections due to the low number of cases.

| <b>Parasite prevalence (univariate)</b>         |           |               |                                       |
|-------------------------------------------------|-----------|---------------|---------------------------------------|
| <b>Variable</b>                                 | <b>OR</b> | <b>95% CI</b> | <b><i>P</i>-value<sup>a</sup></b>     |
| Fever, headache or chills                       | 0.31      | 0.25, 0.38    | <b>&lt;0.001</b>                      |
| Survey                                          |           |               |                                       |
| Dec-13                                          | 1         |               |                                       |
| Mar-14                                          | 1.23      | 0.86, 1.77    | 0.256                                 |
| Jun-14                                          | 0.46      | 0.33, 0.65    | <b>&lt;0.001</b>                      |
| Sep-14                                          | 0.14      | 0.09, 0.24    | <b>&lt;0.001</b>                      |
| Dec-14                                          | 0.05      | 0.02, 0.11    | <b>&lt;0.001</b> ( <i>&lt;0.001</i> ) |
| <b>Parasite prevalence (multivariate model)</b> |           |               |                                       |
| <b>Variable</b>                                 | <b>OR</b> | <b>95% CI</b> | <b><i>P</i>-value<sup>a</sup></b>     |
| Age category                                    |           |               |                                       |
| ≤5y                                             | 1         |               |                                       |
| >5y - 10y                                       | 0.70      | 0.33, 1.51    | 0.365                                 |
| >10y - 15y                                      | 0.89      | 0.41, 1.90    | 0.761                                 |
| >15y - 25y                                      | 0.36      | 0.15, 0.84    | <b>0.018</b>                          |
| >25y                                            | 0.59      | 0.30, 1.15    | 0.122 ( <i>0.112</i> )                |
| Fever, headache or chills                       | 0.30      | 0.24, 0.37    | <b>&lt;0.001</b>                      |
| Survey                                          |           |               |                                       |
| Dec-13                                          | 1         |               |                                       |
| Mar-14                                          | 1.65      | 1.03, 2.65    | <b>0.037</b>                          |
| Jun-14                                          | 0.50      | 0.32, 0.78    | <b>0.003</b>                          |
| Sep-14                                          | 0.20      | 0.10, 0.37    | <b>&lt;0.001</b>                      |
| Dec-14                                          | 0.07      | 0.03, 0.18    | <b>&lt;0.001</b> ( <i>&lt;0.001</i> ) |

<sup>a</sup>result of Wald test shown in brackets. OR, odds ratio ; CI, confidence interval.
