# Supplementary material for: Predominance of asymptomatic and sub-microscopic infections characterizes the Plasmodium gametocyte reservoir in the Peruvian Amazon
Source: PubMed Central journal article supplement (PMC5510906; doi:10.1371/journal.pntd.0005674), 2017-07-03

**S1 Fig. *Plasmodium* densities by qPCR/RTqPCR.** A) *P.vivax* and *P.falciparum* parasite densities by qPCR as 18S rRNA copy numbers/ $\mu$ l of blood. B) *P.vivax* and *P.falciparum* gametocyte density estimates as gametocytes/ $\mu$ l of blood by RTqPCR. Numbers in brackets indicate number of observations at each survey.

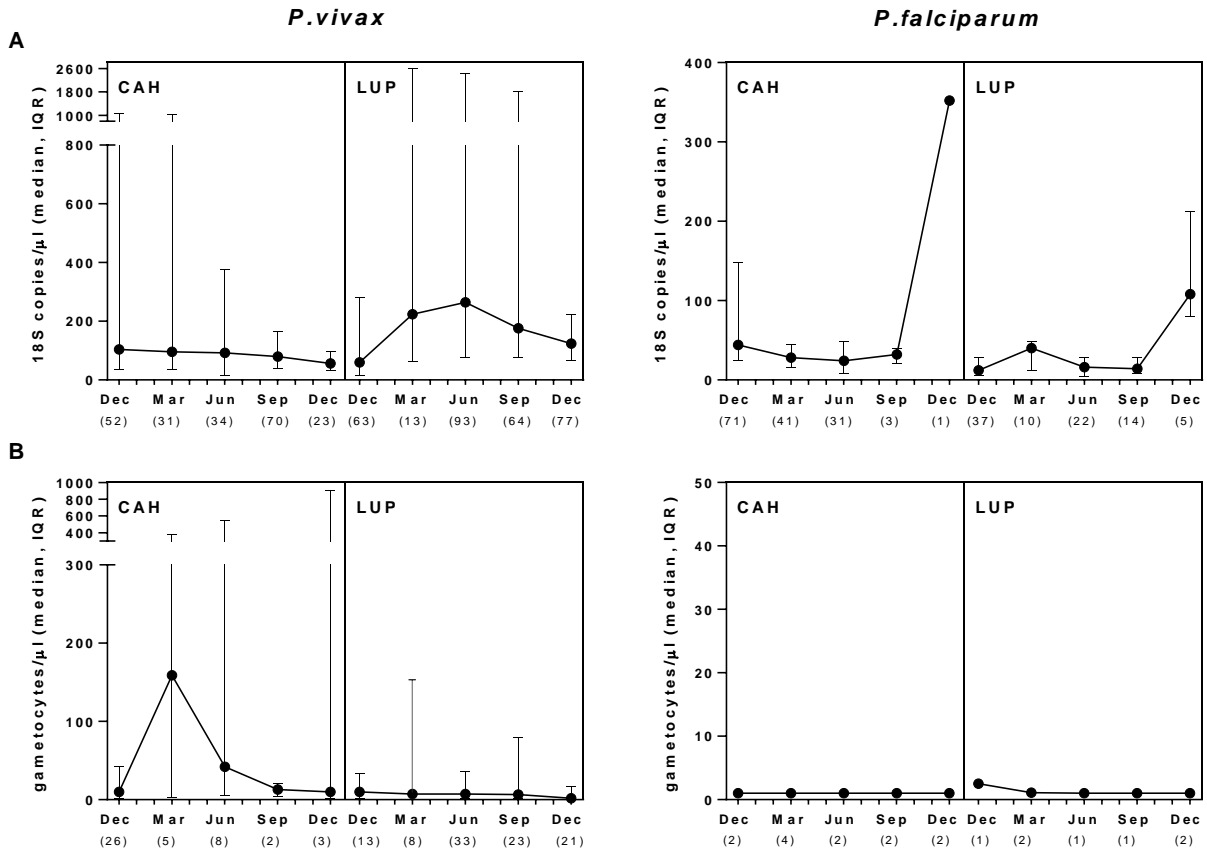

Supplement: pntd.0005674.s006.pdf [file pntd.0005674.s006.pdf]
